# Supplementary material
Source: PubMed Central journal article supplement (PMC2758360)
Supplement: 11306_2008_107_MOESM1_ESM.pdf [file 11306_2008_107_MOESM1_ESM.pdf]

**Supplementary Table 1** Subcellular metabolite distributions in wild type and invertase expressing tubers

| Compound        | Wild type   |             |             | U-IN2-30         |                   |                   | U-IN1-33          |                   |                   |
|-----------------|-------------|-------------|-------------|------------------|-------------------|-------------------|-------------------|-------------------|-------------------|
|                 | Plastid     | Cytosol     | Vacuole     | Plastid          | Cytosol           | Vacuole           | Plastid           | Cytosol           | Vacuole           |
| Fructose        | 16.0 ± 4.8  | 2.8 ± 2.8   | 81.2 ± 4.9  | <u>5.5 ± 2.9</u> | 11.5 ± 4.0        | 83.0 ± 1.5        | 21.8 ± 4.9        | 3.0 ± 2.6         | 75.3 ± 4.2        |
| Glucose         | 5.2 ± 3.2   | 21.2 ± 7.4  | 73.6 ± 6.3  | 9.8 ± 4.6        | 45.0 ± 9.8        | <b>45.3 ± 5.6</b> | 19.3 ± 8.1        | 21.5 ± 8.9        | 59.3 ± 7.6        |
| Mannose         | 3.0 ± 1.9   | 1.0 ± 0.6   | 96.0 ± 2.5  | 3.3 ± 1.6        | 4.5 ± 2.3         | 93.0 ± 2.7        | 1.3 ± 0.6         | 1.8 ± 1.5         | 97.0 ± 1.3        |
| Isomaltose      |             |             |             | 6.0 ± 4.9        | 29.8 ± 12.6       | 64.3 ± 9.7        |                   |                   |                   |
| Trehalose       |             |             |             | 14.5 ± 9.8       | 75.0 ± 9.9        | 9.5 ± 5.7         |                   |                   |                   |
| Maltose         |             |             |             | 28.0 ± 9.1       | <b>71.3 ± 9.6</b> | <b>0.8 ± 0.6</b>  |                   |                   |                   |
| Sucrose         | 4.2 ± 2.5   | 13.8 ± 3.2  | 82.0 ± 3.3  | 33.8 ± 16.9      | 39.5 ± 19.6       | <b>26.8 ± 9.7</b> | <b>31.8 ± 5.9</b> | <b>56.3 ± 3.5</b> | <b>12.0 ± 4.0</b> |
| Inositol        | 16.4 ± 4.9  | 13.2 ± 3.0  | 70.4 ± 3.3  | 16.5 ± 4.0       | <b>51.0 ± 6.9</b> | <b>32.5 ± 5.4</b> | 27.0 ± 4.6        | <u>11.3 ± 4.7</u> | <u>61.8 ± 2.5</u> |
| Maltitol        |             |             |             | 25.3 ± 13.8      | 44.5 ± 18.6       | 30.3 ± 18.2       |                   |                   |                   |
| Mannitol        | 17.6 ± 4.6  | 22.0 ± 7.9  | 60.0 ± 5.3  | 20.3 ± 11.2      | 35.8 ± 12.8       | <b>44.0 ± 2.4</b> | 30.0 ± 5.6        | 6.5 ± 3.4         | <u>63.5 ± 3.3</u> |
| Fru-6-P         | 41.6 ± 13.5 | 54.8 ± 12.4 | 1.6 ± 1.6   | <b>4.3 ± 3.7</b> | <b>95.8 ± 3.7</b> | 0.0 ± 0.0         | 44.3 ± 18.5       | 48.7 ± 20.7       | 7.0 ± 2.9         |
| Glu-6-P         | 42.0 ± 13.5 | 54.6 ± 12.7 | 3.4 ± 2.1   | 13.0 ± 6.8       | 87.0 ± 6.8        | 0.0 ± 0.0         | 50.3 ± 16.0       | 46.3 ± 16.6       | 3.5 ± 3.0         |
| 3-P-glycerate   | 30.0 ; 28.0 | 61.0 ; 72.0 | 9.0 ; 0.0   | 12.5 ± 7.8       | 87.5 ± 7.8        | 0.0 ± 0.0         | 35.5 ± 10.9       | 58.8 ± 13.5       | 5.8 ± 3.2         |
| Sorbitol-6-P    | 30.0 ; 28.0 | 61.0 ; 72.0 | 9.0 ; 0.0   | 12.5 ± 7.8       | 87.5 ± 7.8        | 0.0 ± 0.0         | 35.5 ± 10.9       | 58.8 ± 13.5       | 5.8 ± 3.2         |
| Ascorbate       | 67.0 ; 58.0 | 0.0 ; 42.0  | 28.0 ; 0.0  | 72.3 ± 6.7       | 0.0 ± 0.0         | 27.8 ± 6.7        | 57.3 ± 13.7       | 4.3 ± 3.1         | 38.3 ± 14.4       |
| Citrate         | 1.0 ± 1.0   | 13.2 ± 8.1  | 85.8 ± 7.7  | 3.3 ± 1.6        | 4.5 ± 2.3         | 93.0 ± 2.7        | 1.3 ± 0.6         | 1.8 ± 1.5         | 97.0 ± 1.3        |
| Fumarate        | 3.4 ± 1.8   | 7.0 ± 3.8   | 89.6 ± 3.3  | 5.0 ± 2.7        | <b>23.8 ± 4.9</b> | <b>71.3 ± 2.4</b> | 3.8 ± 2.1         | 16.8 ± 6.6        | 79.5 ± 5.4        |
| Glycerate       | 0.0 ; 35.0  | 94.0 ; 27.0 | 6.0 ; 38.0  | 13.8 ± 5.2       | 26.8 ± 6.7        | 59.5 ± 3.4        | 18.3 ± 6.2        | 20.3 ± 10.0       | 61.5 ± 5.5        |
| Isocitrate      | 3.0 ± 1.9   | 1.0 ± 0.6   | 96.0 ± 2.5  | 3.3 ± 1.6        | 4.5 ± 2.3         | 93.0 ± 2.7        | 1.3 ± 0.6         | 1.8 ± 1.5         | 97.0 ± 1.3        |
| α-Ketoglutarate | 22.0 ; 25.0 | 48.0 ; 51.0 | 30.0 ; 24.0 | 23.3 ± 9.8       | 52.3 ± 13.3       | 24.5 ± 4.3        | 41.0 ± 13.9       | 30.0 ± 10.8       | 29.0 ± 3.4        |
| Malate          | 3.0 ± 1.9   | 1.0 ± 0.6   | 96.0 ± 2.5  | 3.3 ± 1.6        | 4.5 ± 2.3         | 93.0 ± 2.7        | 1.3 ± 0.6         | 1.8 ± 1.5         | 97.0 ± 1.3        |
| Oxalate         | 3.0 ; 5.0   | 23.0 ; 0.0  | 74.0 ; 95.0 | 0.0 ± 0.0        | 16.3 ± 5.6        | 83.8 ± 5.6        | 2.3 ± 1.9         | 9.3 ± 4.9         | 88.5 ± 4.2        |
| Quinate         | 4.0 ± 1.8   | 2.6 ± 0.7   | 93.4 ± 2.0  | 5.8 ± 2.9        | 1.5 ± 0.8         | 92.8 ± 2.7        | 6.5 ± 1.3         | 2.8 ± 2.4         | 90.8 ± 2.3        |
| Shikimate       | 16.4 ± 5.5  | 19.8 ± 8.3  | 63.8 ± 4.5  | 16.0 ± 6.0       | 15.3 ± 3.5        | 68.8 ± 4.1        | 30.0 ± 14.2       | 23.0 ± 6.0        | 47.0 ± 8.5        |
| Succinate       | 13.2 ± 6.4  | 12.4 ± 5.1  | 74.4 ± 6.7  | 13.0 ± 5.2       | <b>53.3 ± 5.4</b> | <b>33.8 ± 2.1</b> | 11.8 ± 2.9        | <u>9.3 ± 4.9</u>  | <u>79.0 ± 2.1</u> |

Developing tuber samples were taken from 10-week-old plants grown in 2 L pots in the greenhouse. The tissue was fractionated using a non-aqueous procedure. Metabolites in each fraction were measured in methanol extracts using GC-MS. The subcellular distributions were calculated by comparing the metabolite and marker enzyme distributions using a three-compartment calculation program. Results represent the means ± SE of measurements on 3-5 different fractionations from different tuber samples, or the single measurements of two fractionations.

Numbers in bold represent subcellular distributions statistically different from the wild-type ( $p < 0.05$ ). Underlined numbers represent subcellular distributions statistically different between U-IN1-33 and U-IN2-30 ( $p < 0.05$ ).

**Supplementary Table 2** Subcellular amino acid distributions in wild type and invertase-expressing tubers

| Compound      | Wild type   |             |              | U-IN2-30          |             |                    | U-IN1-33           |             |                   |
|---------------|-------------|-------------|--------------|-------------------|-------------|--------------------|--------------------|-------------|-------------------|
|               | Plastid     | Cytosol     | Vacuole      | Plastid           | Cytosol     | Vacuole            | Plastid            | Cytosol     | Vacuole           |
| Alanine       | 5.0 ± 3.3   | 18.4 ± 7.4  | 76.6 ± 9.0   | 31.3 ± 11.8       | 14.0 ± 6.8  | 54.8 ± 7.0         | <b>32.5 ± 6.9</b>  | 10.8 ± 9.3  | 56.8 ± 6.3        |
| b-Alanine     | 1.0 ; 0.0   | 14.0 ; 18.0 | 85.0 ; 82.0  | 14.3 ± 4.4        | 8.0 ± 5.3   | 77.8 ± 2.2         | 16.0 ± 3.4         | 4.3 ± 3.7   | 79.8 ± 2.9        |
| Arginine      | 8.8 ± 8.8   | 12.2 ± 3.7  | 79.0 ± 9.9   | 17.3 ± 5.7        | 6.8 ± 5.6   | 76.0 ± 2.7         | 15.0 ± 5.0         | 3.0 ± 2.6   | 82.0 ± 4.9        |
| Asparagine    | 29.0 ± 4.3  | 6.2 ± 2.9   | 64.8 ± 5.3   | 23.0 ± 4.4        | 15.0 ± 8.3  | 62.0 ± 5.3         | 28.8 ± 3.9         | 3.8 ± 3.2   | 67.5 ± 2.0        |
| Aspartate     | 50.6 ± 12.8 | 28.2 ± 10.8 | 21.2 ± 6.3   | 22.5 ± 11.2       | 44.3 ± 14.0 | 33.3 ± 7.5         | 41.0 ± 8.2         | 22.8 ± 7.5  | 36.3 ± 1.7        |
| Cysteine      | 0.0 ; 12.0  | 25.0 ; 14.0 | 75.0 ; 74.0  | 16.8 ± 6.4        | 6.5 ± 5.6   | 76.8 ± 4.3         | 23.0 ± 7.6         | 8.5 ± 7.4   | 68.5 ± 3.8        |
| GABA          | 0.0 ; 0.0   | 14.0 ; 7.0  | 86.0 ; 93.0  | 11.5 ± 3.0        | 5.0 ± 3.3   | 83.5 ± 1.7         | 11.3 ± 3.9         | 4.0 ± 3.5   | 84.8 ± 3.5        |
| Glutamate     | 38.2 ± 7.8  | 39.6 ± 10.0 | 22.2 ± 5.9   | 22.8 ± 11.2       | 52.5 ± 15.0 | 24.8 ± 5.3         | 42.3 ± 7.2         | 37.0 ± 6.2  | 20.8 ± 2.0        |
| Glutamine     | 19.6 ± 3.9  | 10.6 ± 4.1  | 69.8 ± 5.2   | 27.8 ± 9.6        | 9.5 ± 8.2   | 62.8 ± 5.3         | 17.5 ± 5.6         | 9.8 ± 4.4   | 72.8 ± 2.3        |
| Glycine       | 14.0 ± 6.0  | 12.0 ± 2.7  | 74.0 ± 5.1   | 23.8 ± 6.2        | 11.5 ± 5.8  | 64.8 ± 2.5         | 24.5 ± 4.5         | 6.8 ± 5.0   | 68.8 ± 1.5        |
| Histidine     | 8.0 ; 0.0   | 1.0 ; 0.0   | 91.0 ; 100.0 | 13.0 ± 4.6        | 0.0 ± 0.0   | 87.0 ± 4.6         | 12.0 ± 4.7         | 0.0 ± 0.0   | 88.0 ± 4.7        |
| Homoserine    | 20.6 ± 6.6  | 6.4 ± 3.4   | 73.0 ± 4.0   | 28.5 ± 9.1        | 16.8 ± 8.4  | <b>54.8 ± 1.6</b>  | 15.0 ± 11.9        | 37.5 ± 14.8 | <b>47.5 ± 9.4</b> |
| Isoleucine    | 7.6 ± 4.7   | 18.4 ± 6.0  | 74.0 ± 6.7   | 23.8 ± 9.5        | 8.3 ± 4.2   | 68.0 ± 5.7         | <b>36.0 ± 8.0</b>  | 8.5 ± 7.1   | 55.5 ± 6.5        |
| Leucine       | 7.2 ± 4.8   | 31.8 ± 4.6  | 61.0 ± 6.5   | 25.0 ± 10.0       | 14.3 ± 7.2  | 60.8 ± 3.4         | <b>36.3 ± 10.8</b> | 15.0 ± 9.2  | 48.8 ± 7.7        |
| Lysine        | 5.2 ± 1.8   | 4.8 ± 2.0   | 90.0 ± 2.8   | 30.5 ± 11.6       | 19.0 ± 10.1 | <b>50.5 ± 1.9</b>  | <b>34.8 ± 5.8</b>  | 11.5 ± 6.0  | <b>53.8 ± 3.2</b> |
| Methionine    | 11.2 ± 2.0  | 5.2 ± 2.2   | 83.6 ± 1.7   | 23.0 ± 6.3        | 6.5 ± 4.3   | <b>70.5 ± 3.4</b>  | <b>28.3 ± 5.8</b>  | 5.3 ± 4.5   | <b>66.5 ± 4.9</b> |
| Phenylalanine | 19.8 ± 3.8  | 18.0 ± 5.5  | 62.2 ± 4.4   | 25.0 ± 7.2        | 14.5 ± 7.7  | 60.5 ± 2.0         | <b>38.8 ± 5.2</b>  | 8.8 ± 7.6   | 52.5 ± 2.7        |
| Ornithine     | 14.6 ± 6.4  | 4.4 ± 3.2   | 81.0 ± 7.8   | 22.8 ± 5.9        | 10.5 ± 4.5  | 66.8 ± 2.3         | 27.0 ± 6.3         | 5.8 ± 3.9   | 67.3 ± 4.3        |
| 5-Oxoproline  | 4.0 ; 12.0  | 43.0 ; 32.0 | 53.0 ; 56.0  | 27.8 ± 12.6       | 39.5 ± 18.6 | <u>32.8 ± 7.7</u>  | 16.0 ± 5.1         | 21.5 ± 2.1  | <u>62.5 ± 3.3</u> |
| Proline       | 8.4 ± 5.2   | 26.4 ± 9.2  | 65.2 ± 10.8  | 16.0 ± 8.3        | 27.0 ± 21.1 | <u>57.0 ± 17.3</u> | 35.5 ± 11.4        | 7.0 ± 3.8   | 57.5 ± 8.2        |
| Serine        | 13.2 ± 6.4  | 19.6 ± 6.9  | 67.2 ± 4.5   | 20.0 ± 9.6        | 24.3 ± 8.6  | 55.8 ± 4.5         | 37.3 ± 9.8         | 9.5 ± 7.4   | 53.3 ± 4.9        |
| Threonine     | 13.6 ± 6.2  | 11.8 ± 2.7  | 74.6 ± 5.4   | 17.5 ± 7.7        | 11.0 ± 5.9  | 69.8 ± 4.0         | 29.3 ± 6.8         | 5.5 ± 4.8   | 66.8 ± 5.6        |
| Tryptophane   | 29.0 ± 12.3 | 7.4 ± 5.3   | 63.6 ± 11.3  | <u>10.8 ± 5.4</u> | 0.0 ± 0.0   | <u>89.3 ± 5.4</u>  | <u>38.8 ± 6.0</u>  | 8.5 ± 7.4   | <u>52.8 ± 6.7</u> |
| Tyrosine      | 21.2 ± 2.7  | 8.4 ± 4.5   | 70.4 ± 6.2   | 22.3 ± 6.2        | 16.8 ± 8.5  | 61.0 ± 3.8         | <b>37.3 ± 5.8</b>  | 10.0 ± 8.1  | 52.5 ± 6.2        |
| Valine        | 5.2 ± 3.1   | 20.6 ± 5.7  | 74.2 ± 6.7   | 25.3 ± 10.3       | 7.8 ± 4.1   | 67.0 ± 6.9         | <b>31.0 ± 4.9</b>  | 7.3 ± 6.3   | 61.8 ± 5.6        |

Developing tuber samples were taken from 10-week-old plants grown in 2 L pots in the greenhouse. The tissue was fractionated using a non-aqueous procedure. Metabolites in each fraction were measured in methanol extracts using GC-MS. The subcellular distributions were calculated by comparing the metabolite and marker enzyme distributions using a three-compartment calculation program. Results represent the means ± SE of measurements on 3-5 different fractionations from different tuber samples, or the single measurements of two fractionations.

Numbers in bold represent subcellular distributions statistically different from the wild-type ( $p < 0.05$ ). Underlined numbers represent subcellular distributions statistically different between U-IN1-33 and U-IN2-30 ( $p < 0.05$ ).
